# Supplementary material
Source: Elsevier journal article supplement (https://www.sciencedirect.com/science/article/pii/S0212656717308387)
Supplement: mmc1 [file S0212656717308387:mmc1.docx]

| Base de datos | Cadena de búsqueda | Resultado | Seleccionados | Eliminados |
| --- | --- | --- | --- | --- |
| Cuiden plus | (Embarazo and adolescen and (interven or preven or educa) | 88 | 7 | 3 |
| Lilacs | Embarazo$ and adolescent$ and interven$ | 51 | 5 | 1 |
| IME | Embarazo y (adolescente o adolescentes) | 38 | 3 | 2 |
| Pubmed | (Pregnancy in adolescence[mh] or pregnancy in adolescence[tiab] or teen pregnan*[tiab] or adolescent pregnan*[tiab] or teenager pregnan*[tiab] or preteen pregnan*[tiab]) and (Primary Prevention[mh] or primary prevention[tiab] or prevent*[tiab]) and (Health education[mh] or health education[tiab] or comunity health education[tiab] or educative program*[tiab] or educat*[tiab]) and (treatment outcome[mh] or program evaluation[mh] or treatment outcome[tiab] or program evaluation[tiab] or effectiveness* program*[tiab] or program* effect*[tiab] or outcome*[tiab] or clinical effect*[tiab] or treatment effect*[tiab]). | 336 | 31 | 13 |
| Cinhal | (MH Pregnancy in adolescence or AB pregnancy in adolescence* or AB teen pregnan* or AB adolescent pregnan* or AB teenager pregnan* or AB preteen pregnan*) and (MH Primary Prevention or AB primary prevention or AB prevent*) and (MH Health education or AB health education or AB comunity health education or AB educative program* or AB educat*) and (MH treatment outcome or MH program evaluation or AB treatment outcome or AB program evaluation or AB effectiveness* program* or AB program* effect* or AB outcome* or AB clinical effect* or AB treatment effect*). | 296 | 22 | 14 |
| Scopus | ((INDEXTERMS(Pregnancy in adolescence) or TITLE-ABS(pregnancy in adolescence*) or TITLE-ABS(teen pregnan*) or TITLE-ABS(adolescent pregnan*) or TITLE-ABS(teenager pregnan*) or TITLE-ABS(preteen pregnan*)) and (INDEXTERMS(Primary Prevention) or TITLE-ABS(primary prevention)or TITLE-ABS (Prevent*)) and (INDEXTERMS(Health education) or TITLE-ABS(health education) or TITLE-ABS(comunity health education) or TITLE-ABS(educative program*) or TITLE-ABS(educat*)) and (INDEXTERMS(treatment outcome) or INDEXTERMS(program evaluation) or TITLE-ABS(treatment outcome) or TITLE-ABS(program evaluation) or TITLE-ABS(effectiveness* program*) or TITLE-ABS(program* effect*) or TITLE-ABS(outcome*) or TITLE-ABS(clinical effect*) or TITLE-ABS(treatment effect*))). | 421 | 22 | 18 |
